# Supplementary material for: Quercetin Reduces Cortical GABAergic Transmission and Alleviates MK-801-Induced Hyperactivity
Source: PubMed Central journal article supplement — eBioMedicine. 2018 Jul 26;34:201–13. doi: 10.1016/j.ebiom.2018.07.031 (PMC6116474; doi:10.1016/j.ebiom.2018.07.031), 2018-07-26

## Supplementary data

### **Quercetin reduces cortical GABAergic transmission and alleviates MK-801-induced hyperactivity**

Hui-Ran Fan<sup>1,4</sup>, Wei-Feng Du<sup>1,4</sup>, Tao Zhu<sup>1,4</sup>, Yan-Jiao Wu<sup>3,4</sup>, Yan-Mei Liu<sup>2</sup>, Qi Wang<sup>3</sup>, Qin Wang<sup>3</sup>, Xue Gu<sup>3</sup>, Xingyue Shan<sup>2</sup>, Shining Deng<sup>2</sup>, Tailin Zhu<sup>2</sup>, Tian-Le Xu<sup>3</sup>, Wei-Hong Ge<sup>1</sup>, Wei-Guang Li<sup>3</sup>, Fei Li<sup>2</sup>

#### **The PDF file includes:**

**Supplementary Fig. 1.** Effects of different doses of quercetin on MK-801-induced locomotor hyperactivity in mice.

**Supplementary Fig. 2.** Effects of the combined treatment of quercetin and PTX on MK-801-induced locomotor hyperactivity in mice.

## Supplementary Figure legends

**Supplementary Fig. 1.** Effects of different doses of quercetin on MK-801-induced locomotor hyperactivity in mice. **(A)** Behavioral protocol. **(B)** Sample locomotion traces of mice with vehicle- or quercetin (5 or 20 mg/10 ml per kg)-treatment (i.p.) and then following injection (i.p.) with saline or MK-801 (0.2 mg/10 ml per kg) in addition to a 30 min test session in the open field. **(C)** The total distance of mice during each 5-min interval.  $n = 10$  for each group.  $***p < 0.001$ , saline vs. MK-801;  $##p < 0.01$ ,  $###p < 0.001$ , vehicle vs. quercetin, two way repeated-measures ANOVA. **(D)** The total distance in the 30-min session of mice followed by saline or MK-801 injection.  $n = 10$  for each group.  $**p < 0.01$ , saline vs. MK-801; N.S., not significant difference,  $#p < 0.05$ , vehicle vs. quercetin, unpaired Student's *t*-test.

**Supplementary Fig. 2.** Effects of the combined treatment of quercetin and PTX on MK-801-induced locomotor hyperactivity in mice. **(A)** Behavioral protocol. **(B)** Sample locomotion traces of mice with PTX (1 mg/10 ml per kg) alone or plus quercetin (50 mg/10 ml per kg)-treatment (i.p.) and then following injection (i.p.) with saline or MK-801 (0.2 mg/10 ml per kg) in addition to a 30 min test session in the open field. **(C)** The total distance of mice during each 5-min interval.  $n = 10$  for each group.  $***p < 0.001$ , saline vs. MK-801;  $###p < 0.001$ , vehicle vs. quercetin, two way repeated-measures ANOVA. **(D)** The total distance in the 30-min session of mice followed by saline or MK-801 injection.  $n = 10$  for each group.  $**p < 0.01$ , saline vs. MK-801;  $###p < 0.05$ , PTX vs. PTX + quercetin, unpaired Student's *t*-test.

# Supplementary Figure 1

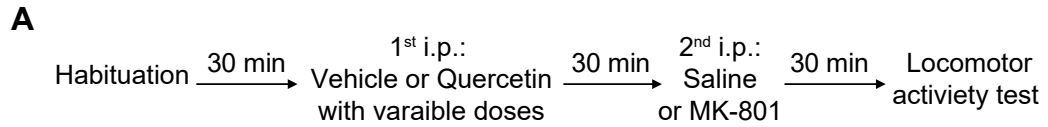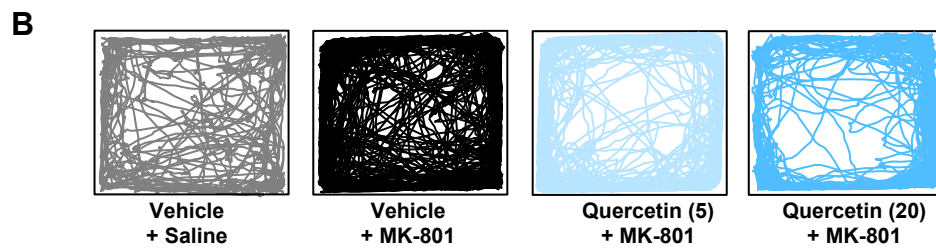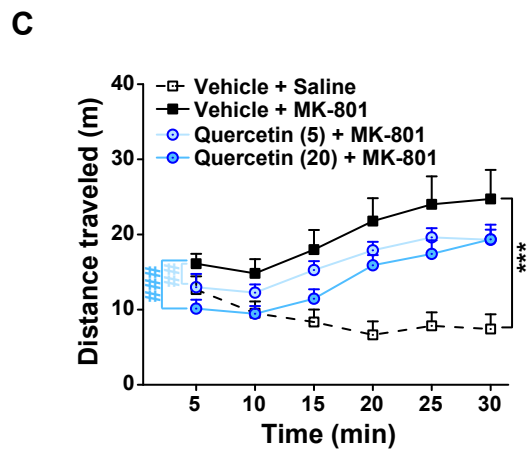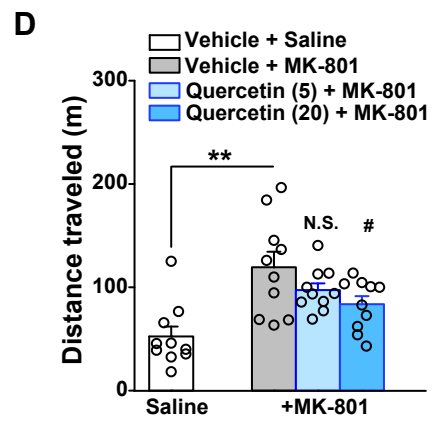

## Supplementary Figure 2

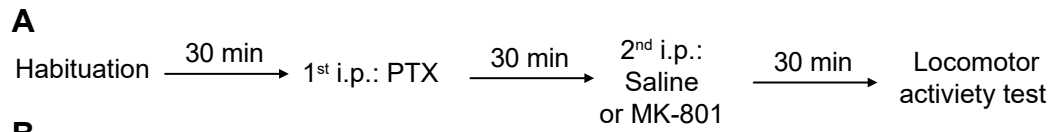

**B**

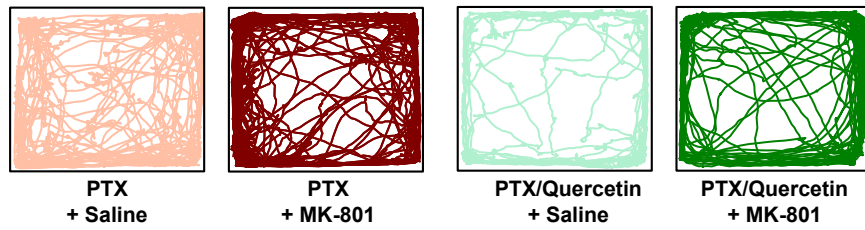

**C**

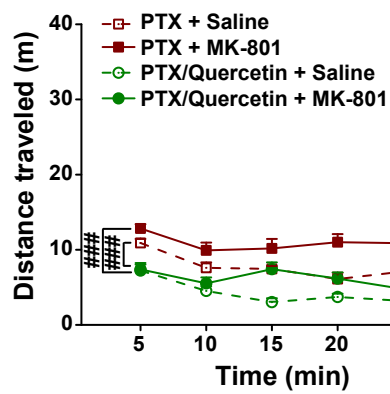

**D**

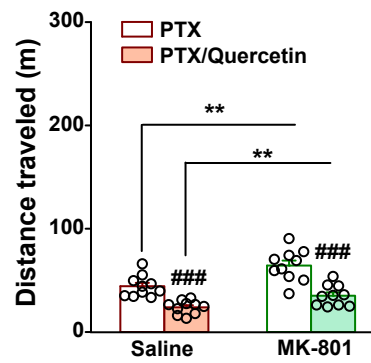

Supplement: mmc1.pdf [file mmc1.pdf]
